# Supplementary material for: Identifying and improving AGU collaborations using network analysis and scientometrics
Source: Copernicus journal article supplement (doi:10.5194/gc-2-55-2019), 2019-02-20
Supplement: Supplementary file 1 [file gc-2-55-2019-supplement.zip]

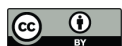

## *Supplement of*

# **Identifying and improving AGU collaborations using network analysis and scientometrics**

**Tom Narock et al.**

*Correspondence to:* Tom Narock (tnarock@ndm.edu)

- gc-2-55-2019-supplement-title-page.pdf
- appendix
  - appendix\_01.png
  - appendix\_02.png
  - appendix\_03.png
  - appendix\_04.png
  - appendix\_05.png
  - appendix\_06.png
  - appendix\_07.png
  - appendix\_08.png
  - appendix\_09.png
  - appendix\_10.png
  - appendix\_11.png
  - appendix\_12.png
  - appendix\_13.png
  - appendix\_14.png
  - appendix\_15.png
  - appendix\_16.png
  - appendix\_17.png
  - appendix\_18.png
  - appendix\_19.png
  - appendix\_20.png
  - appendix\_21.png
  - appendix\_22.png

- appendix\_23.png
- appendix\_24.png
- appendix\_25.png
- appendix\_26.png
- appendix\_27.png
- appendix\_28.png
- appendix\_29.png
- appendix\_30.png
- appendix\_31.png
- appendix\_32.png
- appendix\_33.png
- appendix\_34.png
- appendix\_35.png
- appendix\_36.png
- appendix\_37.png
- appendix\_38.png
- appendix\_39.png
- appendix\_40.png
- appendix\_41.png
- appendix\_42.png
- appendix\_43.png
- appendix\_44.png

The copyright of individual parts of the supplement might differ from the CC BY 4.0 License.
